# Supplementary material for: Efficient Muscle Regeneration by Human PSC-Derived CD82+ ERBB3+ NGFR+ Skeletal Myogenic Progenitors
Source: MDPI journal article supplement (doi:10.3390/cells12030362), 2023-01-18
Supplement: s1 [file s1]

Figure S1

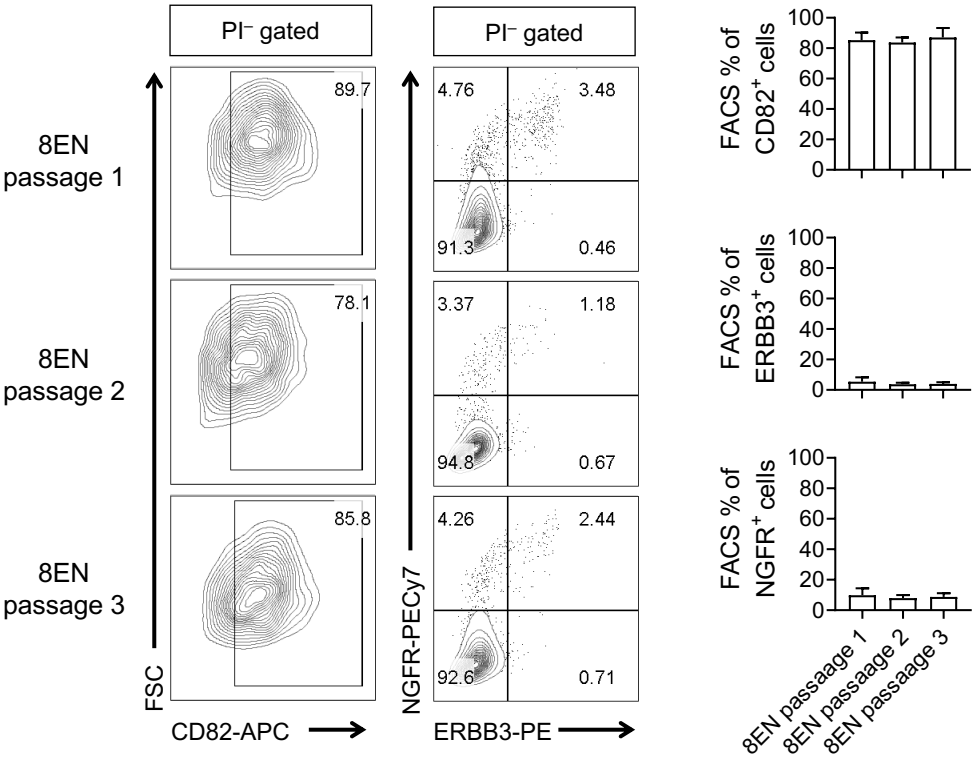

**Figure S1, related to Figure 2, FACS profiling of 8EN cells over 3 passages**  
FACS profiling (left) and quantification (right) of CD82, ERBB3, and NGFR expression in passaged 8EN cells. Data are shown as mean  $\pm$  SEM from 3 biological replicates. No statistical significance in FACS % of all 3 markers was observed among the 3 passages (one-way ANOVA). Note that the FACS plot and quantification for 8EN passage 3 cells were also used in Figure 2B.  
8EN: CD82<sup>+</sup> ERBB3<sup>+</sup> NGFR<sup>+</sup>.

Figure S2

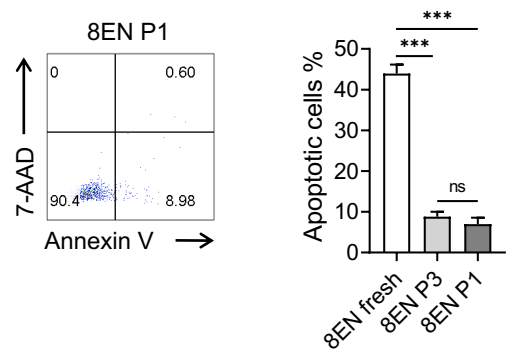

**Figure S2, related to Figure 3, Apoptosis analysis of fresh isolated and passaged 8EN cells**

FACS analysis (left) and quantification (right) of passage 1 8EN cells (8EN P1) for apoptosis. Cells expressing 7-AAD and/or Annexin V were considered as apoptotic. Data are shown as mean  $\pm$  SEM from 4 biological replicates. \*\*\*p <0.001; ns: not significant. Note that quantification for 8EN fresh and 8EN P3 were also used in Figure 3C. 8EN: CD82<sup>+</sup> ERBB3<sup>+</sup> NGFR<sup>+</sup>.
